# Supplementary material for: B cell–derived IL-4 acts on podocytes to induce proteinuria and foot process effacement
Source: JCI journal article supplement (doi:10.1172/jci.insight.81836), 2017-11-01
Supplement: sd1 [file 1]

# Sup Fig.1

**A**

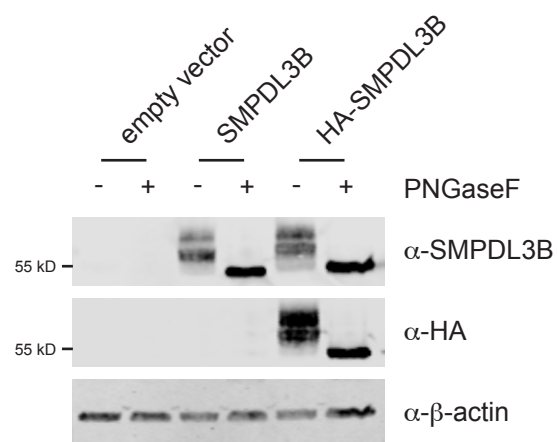

**B**

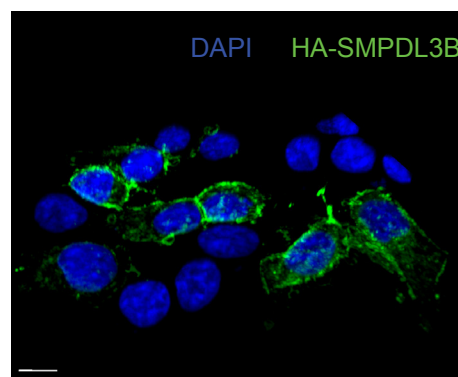

**C**

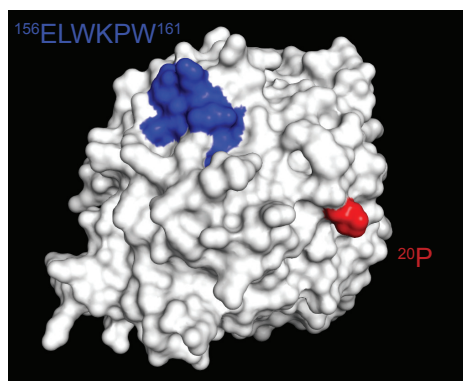

**D**

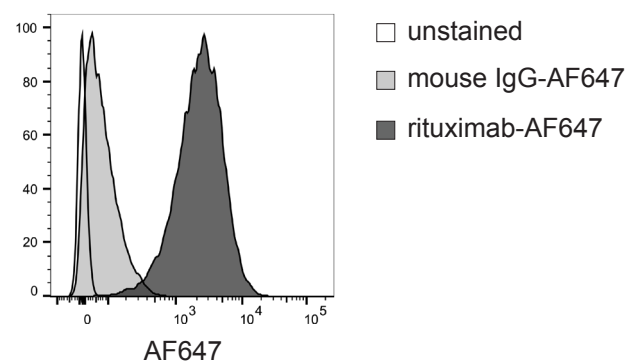

# Sup Fig.2

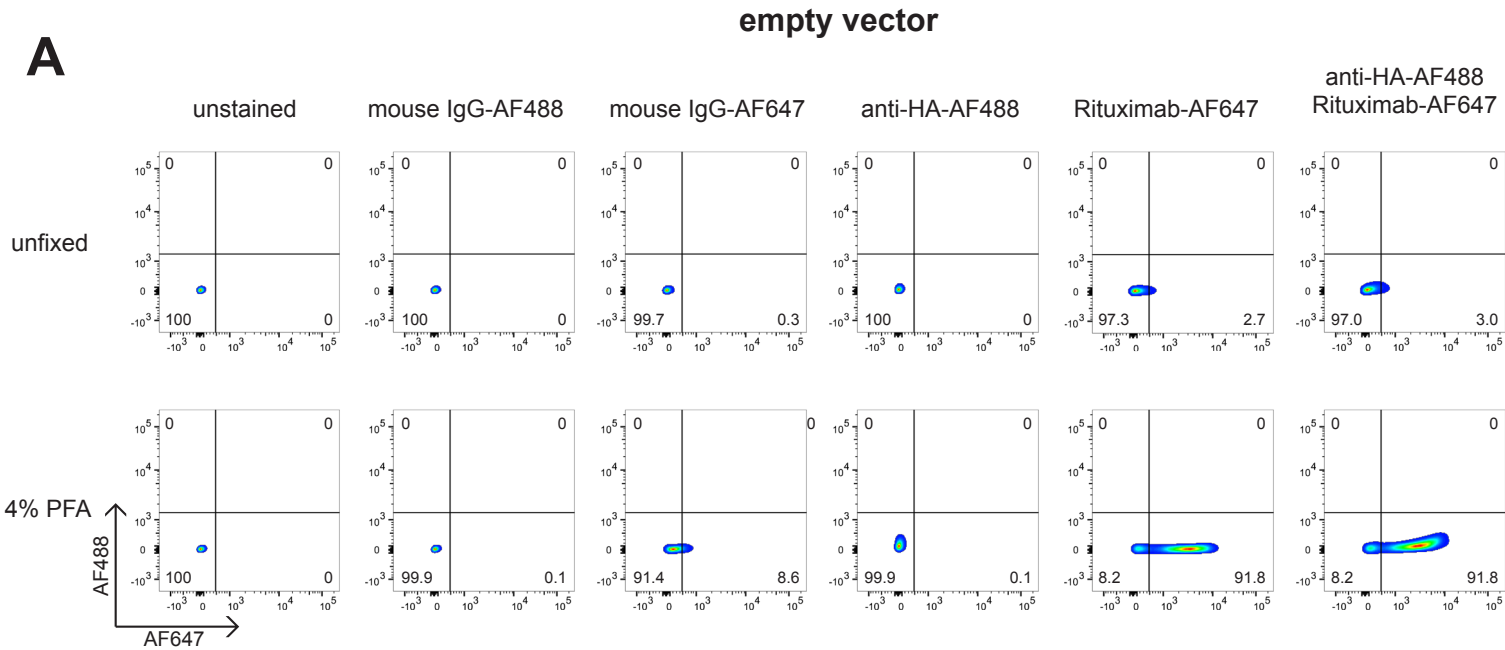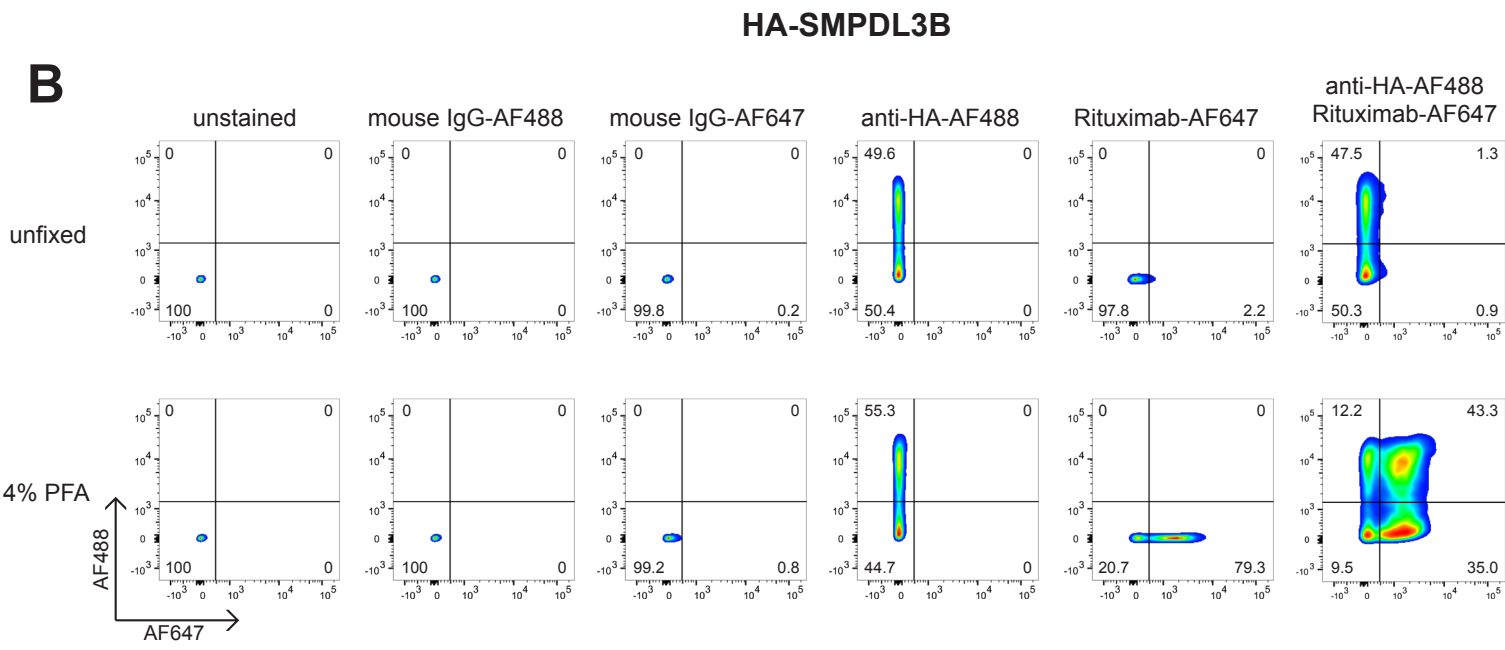

# Sup Fig.3

A

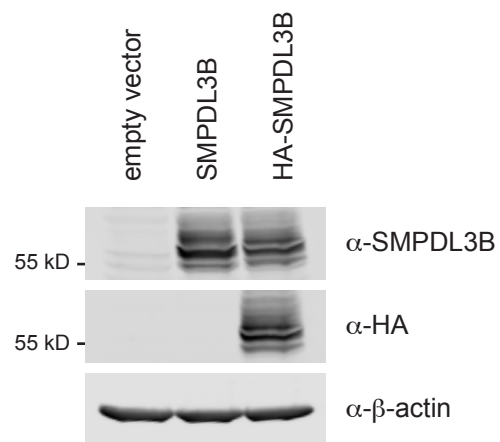

B

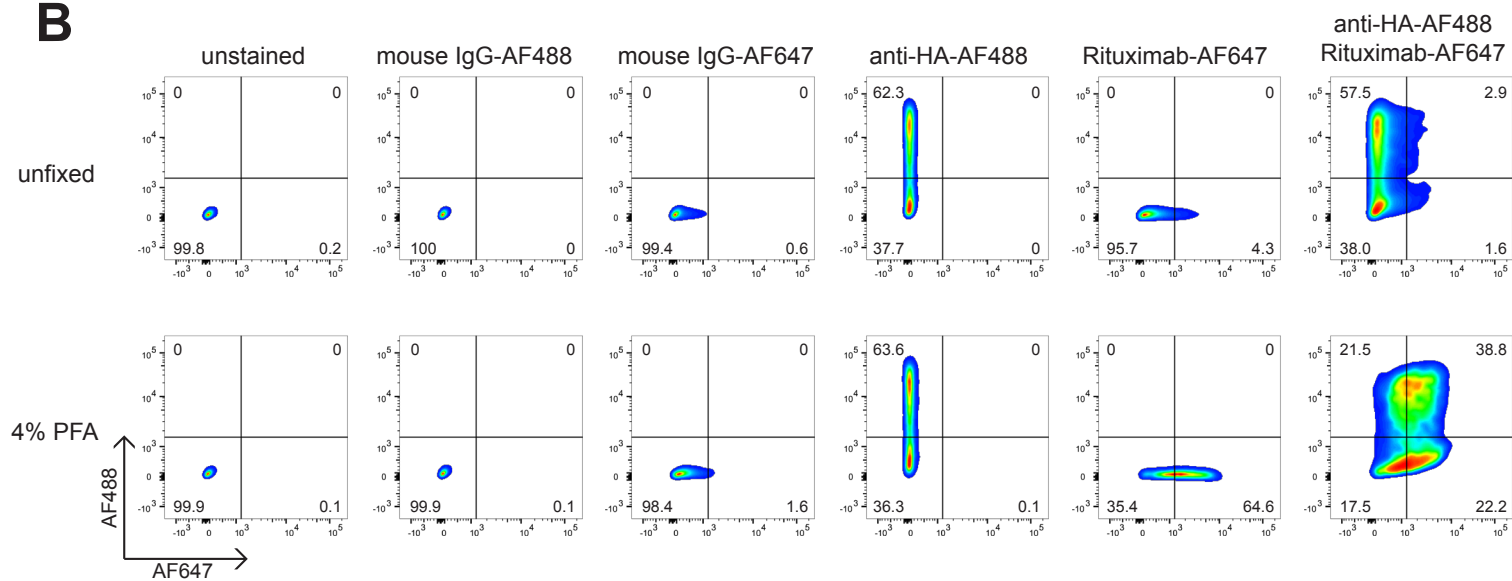

# Sup Fig. 4

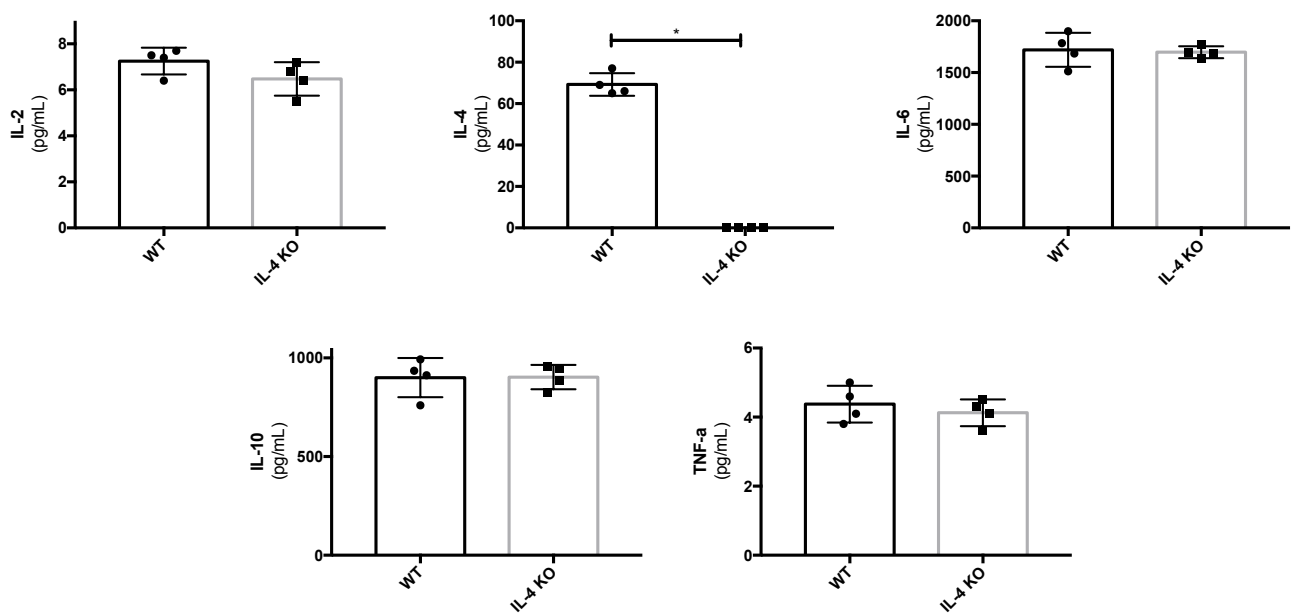

| Patient ID | Age | Gender | Race           | Medical history             | Pathologic findings of kidney biopsy                                                                                                    | Urine protein at time of biopsy     | Clinical/pathologic diagnosis | Immunosuppression at time of biopsy | pSTAT6 staining | Comments                                                                  |
|------------|-----|--------|----------------|-----------------------------|-----------------------------------------------------------------------------------------------------------------------------------------|-------------------------------------|-------------------------------|-------------------------------------|-----------------|---------------------------------------------------------------------------|
| 1          | 64  | Male   | AA             | NS, HTN                     | Diffuse foot process effacement with no electron dense deposits; arteriolar thickening; 2+ glomerular IgG, 1+ glomerular C1q by IF      | 24 hour urine protein of 8.1 grams  | MCD                           | No                                  | ++              | Recurrent presentation (prednisone responsive)                            |
| 2          | 12  | Male   | W              | NS                          | Diffuse foot process effacement; minimal IgM and C1q deposition; no deposits on EM                                                      | UPC 352                             | MCD                           | No                                  | ++              | Incident presentation (prednisone responsive)                             |
| 3          | 5   | Male   | W              | NS                          | Diffuse foot process effacement; negative IF                                                                                            | UPC 431                             | MCD                           | No                                  | +               | Incident presentation (prednisone responsive); good response to rituximab |
| 4          | 14  | Female | South Asian    | NS                          | Diffuse foot process effacement; minimal IgM deposition; no deposits on EM                                                              | UPC 831                             | MCD                           | No                                  | +               | Incident presentation (prednisone responsive)                             |
| 5          | 11  | Male   | W              | NS                          | Diffuse foot process effacement; minimal IgM deposition; no deposits on EM                                                              | UPC 755                             | MCD                           | No                                  | +               | Incident presentation (prednisone responsive)                             |
| 6          | 11  | Male   | W              | NS                          | Diffuse foot process effacement; mild IgM deposition; no deposits on EM                                                                 | UPC 368                             | MCD                           | No                                  | +               | Incident presentation (prednisone responsive)                             |
| 7          | 26  | Female | W              | NS                          | Diffuse foot process effacement, trace C3, otherwise negative                                                                           | UPC 783                             | MCD                           | No                                  | +               | Incident presentation (prednisone responsive)                             |
| 8          | 26  | Female | Afro-caribbean | NS                          | Diffuse foot process effacement; negative IF                                                                                            | UPC 151                             | MCD                           | No                                  | +               | Incident presentation (prednisone responsive)                             |
| 9          | 4   | Female | W              | NS                          | Multifocal foot process effacement with few globally sclerosed glomeruli; 1+ glomerular IgG, 2+ glomerular IgM, 1+ glomerular C'3 by IF | 24 hour urine protein of 1.52 grams | MCD                           | No                                  | +               | Recurrent presentation (prednisone responsive)                            |
| 10         | 10  | Male   | W              | NS                          | Multifocal foot process effacement, mild mesangial proliferation; 1+ glomerular C'3, no glomerular Ig by IF                             | 24 hour urine protein of 22 grams   | MCD                           | No                                  | +               | Incident presentation (prednisone responsive)                             |
| 11         | 28  | Female | W              | NS, obesity, HTN, asthma    | Widespread foot process effacement; 1+ glomerular IgG, no C'3 by IF                                                                     | 24 hour urine protein of 12.4 grams | MCD                           | No                                  | -               | Incident presentation (prednisone responsive)                             |
| 12         | 4   | Male   | W              | NS                          | Diffuse foot process effacement; negative IF                                                                                            | 24 hour urine protein of 6.2 grams  | MCD                           | No                                  | -               | Incident presentation (prednisone resistant, cyclosporine sensitive)      |
| 13         | 20  | Male   | W              | NS                          | Diffuse foot process effacement; minimal mesangial hypercellularity; negative IF                                                        | 24 hour urine protein of 4.6 grams  | MCD                           | No                                  | -               | Incident presentation (prednisone responsive)                             |
| 14         | 50  | Male   | W              | NS                          | Diffuse foot process effacement; negative IF                                                                                            | UPC of 8                            | MCD                           | No                                  | -               | No data                                                                   |
| 15         | 31  | Female | AA             | NS, AKI, CKD                | Diffuse foot process effacement, mild to moderate tubular injury; trace mesangial IgG and IgM by IF                                     | UPC of 18                           | MCD                           | No                                  | -               | No data                                                                   |
| 16         | 52  | Female | W              | Proteinuria, HTN, NSAID use | Diffuse foot process effacement, focal interstitial inflammation with eosinophils; negative IF                                          | 3+ by dipstick                      | MCD, possible due to NSAIDs   | No                                  | -               | No data                                                                   |
| 17         | 40  | Female | W              | NS                          | Diffuse foot process effacement, mild acute tubular injury; 1+ mesangial IgM by IF                                                      | 24 hour urine protein of 18 grams   | MCD                           | No                                  | -               | No data                                                                   |
| 18         | 12  | Male   | West African   | NS                          | Diffuse foot process effacement; mild IgM with minimal C1q, C3 deposition; no deposits on EM                                            | UPC 84                              | MCD                           | No                                  | -               | Incident presentation (prednisone responsive)                             |

|    |                                                                                                                         |        |                                         |                                        |                                                                                                                                          |                                     |     |    |   |                                                |
|----|-------------------------------------------------------------------------------------------------------------------------|--------|-----------------------------------------|----------------------------------------|------------------------------------------------------------------------------------------------------------------------------------------|-------------------------------------|-----|----|---|------------------------------------------------|
| 19 | 12                                                                                                                      | Female | W                                       | NS                                     | Diffuse foot process effacement; mild IgM with minimal C1q, C3 deposition; no deposits on EM                                             | UPC 321                             | MCD | No | - | Incident presentation (prednisone responsive)  |
| 20 | 13                                                                                                                      | Male   | Columbian (W + Native Indian admixture) | NS                                     | Diffuse foot process effacement; mild IgM with minimal C1q, C3 deposition; no deposits on EM                                             | UPC 867                             | MCD | No | - | Incident presentation (prednisone responsive)  |
| 21 | 12                                                                                                                      | Female | West African                            | NS                                     | Diffuse foot process effacement; mild IgM with minimal C1q, C3 deposition; no deposits on EM                                             | UPC 321                             | MCD | No | - | Incident presentation (prednisone responsive)  |
| 22 | 66                                                                                                                      | Male   | W                                       | NS, HTN                                | Diffuse foot process effacement; negative IF                                                                                             | 24 hour urine protein of >3.5 grams | MCD | No | - | No data                                        |
| 23 | 53                                                                                                                      | Female | W                                       | NS                                     | Diffuse foot process effacement, minimal mesangial C1q, otherwise negative                                                               | UPC 943                             | MCD | No | - | Incident presentation (prednisone responsive)  |
| 24 | 48                                                                                                                      | Female | W                                       | NS                                     | Diffuse foot process effacement; mild IgM deposition; no deposits on EM                                                                  | UPC 389                             | MCD | No | - | Incident presentation (prednisone responsive)  |
| 25 | 54                                                                                                                      | Male   | Afro-caribbean                          | NS                                     | Diffuse foot process effacement with mild mesangial proliferative lesion and mild amount of mesangial C3, IgM and C1q; no deposits on EM | UPC 760                             | MCD | No | - | Incident presentation (prednisone responsive)  |
| 26 | 45                                                                                                                      | Female | W                                       | NS                                     | Diffuse foot process effacement, mild tubular atrophy and interstitial fibrosis; 1+ mesangial IgM and C3 by IF                           | 24 hour urine protein of 7 grams    | MCD | No | - | No data                                        |
| 27 | 19                                                                                                                      | Female | W                                       | NS                                     | Diffuse foot process effacement; minimal C1q, C3 deposition; no deposits on EM                                                           | UPC 475                             | MCD | No | - | Incident presentation (prednisone responsive)  |
| 28 | 21                                                                                                                      | Male   | W                                       | NS                                     | Diffuse foot process effacement; mild IgM deposition; no deposits on EM                                                                  | UPC 449                             | MCD | No | - | Incident presentation (prednisone responsive)  |
| 29 | 3                                                                                                                       | Male   | W                                       | NS                                     | Multifocal foot process effacement; negative IF                                                                                          | 24 hour urine protein of 4.72 grams | MCD | No | - | Recurrent presentation (prednisone responsive) |
|    |                                                                                                                         |        |                                         |                                        |                                                                                                                                          |                                     |     |    |   |                                                |
|    |                                                                                                                         |        |                                         | AA: African-American                   | pSTAT6 staining key                                                                                                                      |                                     |     |    |   |                                                |
|    |                                                                                                                         |        |                                         | W: White                               | ++ Prominent nuclear staining with no cytoplasmic background                                                                             |                                     |     |    |   |                                                |
|    |                                                                                                                         |        |                                         |                                        | + Enhanced nuclear staining with cytoplasmic background staining present                                                                 |                                     |     |    |   |                                                |
|    |                                                                                                                         |        |                                         | NS: Nephrotic syndrome                 | - No nuclear or cytoplasmic staining                                                                                                     |                                     |     |    |   |                                                |
|    |                                                                                                                         |        |                                         | HTN: Hypertension                      |                                                                                                                                          |                                     |     |    |   |                                                |
|    |                                                                                                                         |        |                                         | AKI: Acute kidney injury               |                                                                                                                                          |                                     |     |    |   |                                                |
|    |                                                                                                                         |        |                                         | CKD: Chronic kidney disease            |                                                                                                                                          |                                     |     |    |   |                                                |
|    |                                                                                                                         |        |                                         |                                        |                                                                                                                                          |                                     |     |    |   |                                                |
|    |                                                                                                                         |        |                                         | IF: Immunofluorescence                 |                                                                                                                                          |                                     |     |    |   |                                                |
|    |                                                                                                                         |        |                                         | UPC: Urine protein-to-creatinine ratio |                                                                                                                                          |                                     |     |    |   |                                                |
|    |                                                                                                                         |        |                                         | MCD: Minimal change disease            |                                                                                                                                          |                                     |     |    |   |                                                |
|    |                                                                                                                         |        |                                         |                                        |                                                                                                                                          |                                     |     |    |   |                                                |
|    | Supplemental Table 1. Clinical characteristics of minimal change disease patients screened for glomerular phosphoSTAT6. |        |                                         |                                        |                                                                                                                                          |                                     |     |    |   |                                                |
